# Supplementary material
Source: PubMed Central journal article supplement (PMC8476180)
Supplement: NIHMS1722528-supplement-ReportingSummary.pdf [file NIHMS1722528-supplement-ReportingSummary.pdf]

## Reporting Summary

Nature Research wishes to improve the reproducibility of the work that we publish. This form provides structure for consistency and transparency in reporting. For further information on Nature Research policies, see [Authors & Referees](#) and the [Editorial Policy Checklist](#).

### Statistics

For all statistical analyses, confirm that the following items are present in the figure legend, table legend, main text, or Methods section.

n/a Confirmed

- The exact sample size ( $n$ ) for each experimental group/condition, given as a discrete number and unit of measurement
- A statement on whether measurements were taken from distinct samples or whether the same sample was measured repeatedly
- The statistical test(s) used AND whether they are one- or two-sided  
*Only common tests should be described solely by name; describe more complex techniques in the Methods section.*
- A description of all covariates tested
- A description of any assumptions or corrections, such as tests of normality and adjustment for multiple comparisons
- A full description of the statistical parameters including central tendency (e.g. means) or other basic estimates (e.g. regression coefficient) AND variation (e.g. standard deviation) or associated estimates of uncertainty (e.g. confidence intervals)
- For null hypothesis testing, the test statistic (e.g.  $F$ ,  $t$ ,  $r$ ) with confidence intervals, effect sizes, degrees of freedom and  $P$  value noted  
*Give  $P$  values as exact values whenever suitable.*
- For Bayesian analysis, information on the choice of priors and Markov chain Monte Carlo settings
- For hierarchical and complex designs, identification of the appropriate level for tests and full reporting of outcomes
- Estimates of effect sizes (e.g. Cohen's  $d$ , Pearson's  $r$ ), indicating how they were calculated

*Our web collection on [statistics for biologists](#) contains articles on many of the points above.*

### Software and code

Policy information about [availability of computer code](#)

#### Data collection

BD FACSDiva (v.8.0.2) was used to collect flow cytometric data. Illumina HiSeq 2500 or HiSeq 4000 Systems were used to collect sequencing data, and BCL files were converted to FASTQ using bcl2fastq2 (v2.17.1.14, v2.18.0, or v2.20.0.422).

#### Data analysis

FlowJo (v10.5.3) was used for flow cytometric analysis. For bioinformatic analyses, the following software was used:  
 DESeq2 (v.1.14.1 or v.1.22.2)  
 Trimmomatic (v.0.36)  
 Bowtie2 (v.2.2.9 or v.2.3.4)  
 Salmon (v.0.10.2)  
 tximport (v.1.8.0 or v.1.10.1)  
 GenomicAlignments (v1.10.1 or v1.18.1)  
 MACS2 (v.2.1.1.20160309)  
 ChipPeakAnno (v.3.8.9)  
 HOMER (v.4.10.4)  
 limma (v.3.30.13)  
 UCSC mm10 Known Gene Annotation Package (v.9)  
 Irreproducible Discovery Rate (IDR) (v.2.0.2 or v2.0.3)  
 bedtools2 (v.2.26.0)  
 bedGraphToBigWig (v.4)  
 deepTools (v3.2.1)  
 Gviz (v.1.18.2)  
 ComplexHeatmap (v.1.18.1 or v.1.99.7)  
 Cytoscape (v.3.7.1)  
 R (v.3.3.3 or v.3.5.3)

For manuscripts utilizing custom algorithms or software that are central to the research but not yet described in published literature, software must be made available to editors/reviewers. We strongly encourage code deposition in a community repository (e.g. GitHub). See the Nature Research [guidelines for submitting code & software](#) for further information.

## Data

Policy information about [availability of data](#)

All manuscripts must include a [data availability statement](#). This statement should provide the following information, where applicable:

- Accession codes, unique identifiers, or web links for publicly available datasets
- A list of figures that have associated raw data
- A description of any restrictions on data availability

Data generated in this study have been deposited in the Gene Expression Omnibus (GEO Super-Series accession number GSE140044 and GSE164116).

## Field-specific reporting

Please select the one below that is the best fit for your research. If you are not sure, read the appropriate sections before making your selection.

Life sciences       Behavioural & social sciences       Ecological, evolutionary & environmental sciences

For a reference copy of the document with all sections, see [nature.com/documents/nr-reporting-summary-flat.pdf](https://www.nature.com/documents/nr-reporting-summary-flat.pdf)

## Life sciences study design

All studies must disclose on these points even when the disclosure is negative.

|                 |                                                                                                                                                                                                                                                                                                                                                                                                                                                                                                                                        |
|-----------------|----------------------------------------------------------------------------------------------------------------------------------------------------------------------------------------------------------------------------------------------------------------------------------------------------------------------------------------------------------------------------------------------------------------------------------------------------------------------------------------------------------------------------------------|
| Sample size     | Sample sizes were based on our prior experience in these mouse model systems, which typically require 4-5 mice per experimental group and time point for each treatment condition or genetically altered mouse strain compared with 4-5 control mice. In some cases, fewer control mice were used for experiments that were reproducible across independent experiments. Minimal sample size for human studies was chosen based on previous transcriptome studies on primary human NK cell populations (Schlums et al, Immunity 2015). |
| Data exclusions | None.                                                                                                                                                                                                                                                                                                                                                                                                                                                                                                                                  |
| Replication     | All experiments for non-high-throughput sequencing projects were performed on at least 3 biological replicates (individual mice). All high-throughput sequencing projects were performed on at least 2 biological replicates (individual mice or human donors).                                                                                                                                                                                                                                                                        |
| Randomization   | For human studies, experimental groups were not randomized across groups, as control and treatment groups had consisted of the same donors. Age- and sex-matched animals were assigned randomly to control and treatment group, or assigned according to genotype when applicable.                                                                                                                                                                                                                                                     |
| Blinding        | For human studies, experiments were not performed in a blinded fashion, as this was not required for the experimental setup. All control and treatment conditions were performed with paired donor samples. For mouse studies, blinding was not performed since mice were grouped by treatment or genotype.                                                                                                                                                                                                                            |

## Reporting for specific materials, systems and methods

We require information from authors about some types of materials, experimental systems and methods used in many studies. Here, indicate whether each material, system or method listed is relevant to your study. If you are not sure if a list item applies to your research, read the appropriate section before selecting a response.

### Materials & experimental systems

| n/a                                 | Included in the study                                           |
|-------------------------------------|-----------------------------------------------------------------|
| <input type="checkbox"/>            | <input checked="" type="checkbox"/> Antibodies                  |
| <input checked="" type="checkbox"/> | <input type="checkbox"/> Eukaryotic cell lines                  |
| <input checked="" type="checkbox"/> | <input type="checkbox"/> Palaeontology                          |
| <input type="checkbox"/>            | <input checked="" type="checkbox"/> Animals and other organisms |
| <input type="checkbox"/>            | <input checked="" type="checkbox"/> Human research participants |
| <input checked="" type="checkbox"/> | <input type="checkbox"/> Clinical data                          |

### Methods

| n/a                                 | Included in the study                              |
|-------------------------------------|----------------------------------------------------|
| <input type="checkbox"/>            | <input checked="" type="checkbox"/> ChIP-seq       |
| <input type="checkbox"/>            | <input checked="" type="checkbox"/> Flow cytometry |
| <input checked="" type="checkbox"/> | <input type="checkbox"/> MRI-based neuroimaging    |

## Antibodies

Antibodies used

The following mouse antibodies were used for flow cytometry: CD3ε (17A2, Tonbo/BioLegend), TCRβ (H57-597, Tonbo/BioLegend), CD19 (6D5, BioLegend), F4/80 (BM8, BioLegend), NK1.1 (PK136, BioLegend), Ly49H (3D10, eBioscience/BD Biosciences), CD69 (H1.2F3, BioLegend), pSTAT1 (pSer727, A15158B, BioLegend), pSTAT1 (pTyr701, 4a, BD Biosciences), pSTAT4 (pY693, 38/p-Stat4, BD Biosciences), pSTAT5 (pY694, C71E5, Cell Signaling Technology), and Fixable Viability Dye eFluor™ 506 (eBioscience). The following human antibodies were used for flow cytometry: CD3 (UCHT1, BD Biosciences), CD56 (N901, Beckman Coulter) and CD14 (M5E2, Becton Dickinson), CD57 (HCD57, Biolegend), and NKG2C (134591, R&D). The following mouse antibodies was used for magnetic bead depletion and were purchased from BioXCell: CD3ε (17A2), CD4 (GK1.5), CD8

(2.43), Ter119 (TER-119), CD19 (1D3), Ly6G (1A8). The following antibodies were used for ChIP-Seq primarily reported in this study: anti-pSTAT5 (#AF2168, R&D Systems, lot# KVE0318071), anti-H3K4me3 (Millipore, 07-473, lot# 3018770).

#### Validation

Tonbo Biosciences tests all antibodies by flow cytometry. All flow cytometry antibodies from BioLegend, BD Biosciences, Beckman Coulter, Cell Signaling Technology, and R&D have been validated using either human or mouse primary cells or cell lines by flow cytometry. Purified antibodies from BioXCell, R&D, Millipore have been validated by western blot using mouse primary cells or cell lines or human cell lines.

## Animals and other organisms

Policy information about [studies involving animals](#); [ARRIVE guidelines](#) recommended for reporting animal research

#### Laboratory animals

The following strains were used, all on the C57BL/6 genetic background: WT CD45.2 (The Jackson Laboratory), WT CD45.1 (B6.SJL; Taconic), Stat1<sup>-/-</sup>, Nkp46-CreERT2 transgenic mice, and Rosa26-lox-STOP-lox-tdTomato.

#### Wild animals

No wild animals were used in this study.

#### Field-collected samples

No field-collected samples were used in this study.

#### Ethics oversight

All mice used in this study were bred and utilized at Memorial Sloan Kettering Cancer Center in accordance with the guidelines of the Institutional Animal Care and Use Committee (IACUC).

Note that full information on the approval of the study protocol must also be provided in the manuscript.

## Human research participants

Policy information about [studies involving human research participants](#)

#### Population characteristics

Peripheral blood was collected from male and female donors between the ages of 25-45.

#### Recruitment

Samples from healthy donor volunteers were collected at MSKCC. Selection bias may be present, representing only adults ages 25-45.

#### Ethics oversight

All samples were collected following approval by the MSKCC Institutional Review Board, and donors provided informed written consent.

Note that full information on the approval of the study protocol must also be provided in the manuscript.

## ChIP-seq

### Data deposition

- Confirm that both raw and final processed data have been deposited in a public database such as [GEO](#).
- Confirm that you have deposited or provided access to graph files (e.g. BED files) for the called peaks.

#### Data access links

*May remain private before publication.*

<https://www.ncbi.nlm.nih.gov/geo/query/acc.cgi?acc=GSE140043>

#### Files in database submission

Paired fastq files, bigWig files (for IP samples only), and BED files of peak ranges are available for the following samples (sample names are preceded by GEO sample ID):

GSM4151996 ChIP\_mouse\_STAT1KO\_UNSTIM\_6\_H3K4me3\_input  
 GSM4151997 ChIP\_mouse\_STAT1KO\_UNSTIM\_6\_H3K4me3\_IP  
 GSM4151998 ChIP\_mouse\_STAT1KO\_UNSTIM\_9\_H3K4me3\_input  
 GSM4151999 ChIP\_mouse\_STAT1KO\_UNSTIM\_9\_H3K4me3\_IP  
 GSM4152000 ChIP\_mouse\_STAT1KO\_IFNA\_6\_H3K4me3\_input  
 GSM4152001 ChIP\_mouse\_STAT1KO\_IFNA\_6\_H3K4me3\_IP  
 GSM4152002 ChIP\_mouse\_STAT1KO\_IFNA\_9\_H3K4me3\_input  
 GSM4152003 ChIP\_mouse\_STAT1KO\_IFNA\_9\_H3K4me3\_IP  
 GSM4152004 ChIP\_mouse\_STAT1KO\_IFNA\_9a\_H3K4me3\_input  
 GSM4152005 ChIP\_mouse\_STAT1KO\_IFNA\_9a\_H3K4me3\_IP  
 GSM4152006 ChIP\_mouse\_WT\_UNSTIM\_1\_H3K4me3\_input  
 GSM4152007 ChIP\_mouse\_WT\_UNSTIM\_1\_H3K4me3\_IP  
 GSM4152008 ChIP\_mouse\_WT\_UNSTIM\_4\_H3K4me3\_input  
 GSM4152009 ChIP\_mouse\_WT\_UNSTIM\_4\_H3K4me3\_IP  
 GSM4152010 ChIP\_mouse\_WT\_UNSTIM\_3\_H3K4me3\_input  
 GSM4152011 ChIP\_mouse\_WT\_UNSTIM\_3\_H3K4me3\_IP  
 GSM4152012 ChIP\_mouse\_WT\_UNSTIM\_6\_H3K4me3\_input  
 GSM4152013 ChIP\_mouse\_WT\_UNSTIM\_6\_H3K4me3\_IP  
 GSM4152014 ChIP\_mouse\_WT\_UNSTIM\_7\_H3K4me3\_input  
 GSM4152015 ChIP\_mouse\_WT\_UNSTIM\_7\_H3K4me3\_IP  
 GSM4152016 ChIP\_mouse\_WT\_UNSTIM\_8\_H3K4me3\_input

GSM4152017 ChIP\_mouse\_WT\_UNSTIM\_8\_H3K4me3\_IP  
 GSM4152018 ChIP\_mouse\_WT\_UNSTIM\_9\_H3K4me3\_input  
 GSM4152019 ChIP\_mouse\_WT\_UNSTIM\_9\_H3K4me3\_IP  
 GSM4152020 ChIP\_mouse\_WT\_UNSTIM\_1\_STAT5\_input  
 GSM4152021 ChIP\_mouse\_WT\_UNSTIM\_1\_STAT5\_IP  
 GSM4152022 ChIP\_mouse\_WT\_IFNA\_3\_H3K4me3\_input  
 GSM4152023 ChIP\_mouse\_WT\_IFNA\_3\_H3K4me3\_IP  
 GSM4152024 ChIP\_mouse\_WT\_IFNA\_6\_H3K4me3\_input  
 GSM4152025 ChIP\_mouse\_WT\_IFNA\_6\_H3K4me3\_IP  
 GSM4152026 ChIP\_mouse\_WT\_IFNA\_7\_H3K4me3\_input  
 GSM4152027 ChIP\_mouse\_WT\_IFNA\_7\_H3K4me3\_IP  
 GSM4152028 ChIP\_mouse\_WT\_IFNA\_8\_H3K4me3\_input  
 GSM4152029 ChIP\_mouse\_WT\_IFNA\_8\_H3K4me3\_IP  
 GSM4152030 ChIP\_mouse\_WT\_IFNA\_9\_H3K4me3\_input  
 GSM4152031 ChIP\_mouse\_WT\_IFNA\_9\_H3K4me3\_IP  
 GSM4152032 ChIP\_mouse\_WT\_IL12IL18\_1\_H3K4me3\_input  
 GSM4152033 ChIP\_mouse\_WT\_IL12IL18\_1\_H3K4me3\_IP  
 GSM4152034 ChIP\_mouse\_WT\_IL12IL18\_7\_H3K4me3\_input  
 GSM4152035 ChIP\_mouse\_WT\_IL12IL18\_7\_H3K4me3\_IP  
 GSM4152036 ChIP\_mouse\_WT\_IL12IL18\_8\_H3K4me3\_input  
 GSM4152037 ChIP\_mouse\_WT\_IL12IL18\_8\_H3K4me3\_IP  
 GSM4152038 ChIP\_mouse\_WT\_IL2IL15\_4\_H3K4me3\_input  
 GSM4152039 ChIP\_mouse\_WT\_IL2IL15\_4\_H3K4me3\_IP  
 GSM4152040 ChIP\_mouse\_WT\_IL2IL15\_7\_H3K4me3\_input  
 GSM4152041 ChIP\_mouse\_WT\_IL2IL15\_7\_H3K4me3\_IP  
 GSM4152042 ChIP\_mouse\_WT\_IL2IL15\_8\_H3K4me3\_input  
 GSM4152043 ChIP\_mouse\_WT\_IL2IL15\_8\_H3K4me3\_IP  
 GSM4152044 ChIP\_mouse\_WT\_IL2IL15\_1\_STAT5\_input  
 GSM4152045 ChIP\_mouse\_WT\_IL2IL15\_1\_STAT5\_IP  
 GSM4152046 ChIP\_mouse\_WT\_IL2IL15IL12IL18IFNA\_7\_H3K4me3\_input  
 GSM4152047 ChIP\_mouse\_WT\_IL2IL15IL12IL18IFNA\_7\_H3K4me3\_IP  
 GSM4152048 ChIP\_mouse\_WT\_IL2IL15IL12IL18IFNA\_8\_H3K4me3\_input  
 GSM4152049 ChIP\_mouse\_WT\_IL2IL15IL12IL18IFNA\_8\_H3K4me3\_IP  
 GSM4152050 ChIP\_mouse\_WT\_MCMVD0\_2\_H3K4me3\_input  
 GSM4152051 ChIP\_mouse\_WT\_MCMVD0\_2\_H3K4me3\_IP  
 GSM4152052 ChIP\_mouse\_WT\_MCMVD0\_4\_H3K4me3\_input  
 GSM4152053 ChIP\_mouse\_WT\_MCMVD0\_4\_H3K4me3\_IP  
 GSM4152054 ChIP\_mouse\_WT\_MCMVD2\_1\_H3K4me3\_input  
 GSM4152055 ChIP\_mouse\_WT\_MCMVD2\_1\_H3K4me3\_IP  
 GSM4152056 ChIP\_mouse\_WT\_MCMVD2\_2\_H3K4me3\_input  
 GSM4152057 ChIP\_mouse\_WT\_MCMVD2\_2\_H3K4me3\_IP  
 GSM4152058 ChIP\_mouse\_WT\_MCMVD2\_3\_H3K4me3\_input  
 GSM4152059 ChIP\_mouse\_WT\_MCMVD2\_3\_H3K4me3\_IP  
 GSM4152060 ChIP\_mouse\_WT\_MCMVD4\_2\_H3K4me3\_input  
 GSM4152061 ChIP\_mouse\_WT\_MCMVD4\_2\_H3K4me3\_IP  
 GSM4152062 ChIP\_mouse\_WT\_MCMVD4\_3\_H3K4me3\_input  
 GSM4152063 ChIP\_mouse\_WT\_MCMVD4\_3\_H3K4me3\_IP  
 GSM4152064 ChIP\_mouse\_WT\_MCMVD4\_4\_H3K4me3\_input  
 GSM4152065 ChIP\_mouse\_WT\_MCMVD4\_4\_H3K4me3\_IP  
 GSM4152066 ChIP\_mouse\_WT\_MCMVD7\_2\_H3K4me3\_input  
 GSM4152067 ChIP\_mouse\_WT\_MCMVD7\_2\_H3K4me3\_IP  
 GSM4152068 ChIP\_mouse\_WT\_MCMVD7\_3\_H3K4me3\_input  
 GSM4152069 ChIP\_mouse\_WT\_MCMVD7\_3\_H3K4me3\_IP  
 GSM4152070 ChIP\_mouse\_WT\_MCMVD35\_4\_H3K4me3\_input  
 GSM4152071 ChIP\_mouse\_WT\_MCMVD35\_4\_H3K4me3\_IP  
 GSM4152072 ChIP\_mouse\_WT\_MCMVD35\_5\_H3K4me3\_input  
 GSM4152073 ChIP\_mouse\_WT\_MCMVD35\_5\_H3K4me3\_IP

Genome browser session  
 (e.g. [UCSC](#))

Custom scripts in R software were used to visualize ChIP-seq signal without the use of a web-based genome browser session.

## Methodology

### Replicates

For STAT5 ChIP, 4-5 x 10<sup>6</sup> sorted NK (CD3ε- TCRβ- CD19- F4/80- NK1.1+) cells from pooled spleens were cultured for 3 hr in RPMI containing 10% fetal bovine serum with 20 ng/mL recombinant mouse IL-2 plus 20 ng/ml recombinant mouse IL-15, or with just media for unstimulated conditions. This replicate was combined with two other replicates previously published (Villarino et al, JEM 2017; GSE100674) with IL-15-stimulated NK cells cultured for 2 hours.

For in vitro H3K4me3 ChIP, 1-2 x 10<sup>5</sup> sorted splenic NK cells (CD3ε- TCRβ- CD19- F4/80- NK1.1+) were cultured for 3 hr in RPMI containing 10% fetal bovine serum with either 20 ng/mL recombinant mouse IL-2 plus 20 ng/ml recombinant mouse IL-15 (3 replicates), 20 ng/ml recombinant mouse IL-12 plus 10 ng/ml recombinant mouse IL-18 (4 replicates), 100 IU recombinant mouse IFN-α (5 replicates), a combination of all cytokines (2 replicates), or just media for unstimulated conditions (8 replicates). One replicate pair for WT unstimulated and IL-12/IL-18-stimulated conditions was included from a previously published dataset (Rapp et al, Sci Immunol 2017; GSE106137). ChIP experiments were performed across 8

separate experiments from pooled spleens, each with a corresponding unstimulated pair.

For in vivo H3K4me3 ChIP, splenic Ly49H+ NK cells (CD3ε- TCRb- CD19- F4/80- NK1.1+ Ly49H+ CD69+ (d2 only)) from WT mice infected with MCMV and harvested on days 0 (uninfected; 2 replicates), 2 (3 replicates), 4 (3 replicates), and 7 (2 replicates). For the memory time point, NK cells were harvested at 35 post-infection from Nkp46-CreERT2 Rosa26-tdTomato mice that were treated with 4 mg tamoxifen (Sigma) in corn oil by oral gavage one day prior to infection. Memory NK cells were sorted on CD3ε- TCRb- CD19- F4/80- NK1.1+ Ly49H+ tdTomato+ (2 replicates). Each replicate represents one biological replicate harvested from pooled spleens.

## Sequencing depth

All reads were paired-end with lengths of 50 bp. After trimming and filtering for low-quality reads, these were the read numbers for each sample (first number shows total number of filtered read pairs, second number shows number of concordantly aligned read pairs):

ChIP\_mouse\_STAT1KO\_UNSTIM\_6\_H3K4me3\_input: 45233347, 44067276  
 ChIP\_mouse\_STAT1KO\_UNSTIM\_6\_H3K4me3\_IP: 43872620, 41850740  
 ChIP\_mouse\_STAT1KO\_UNSTIM\_9\_H3K4me3\_input: 49111878, 43660926  
 ChIP\_mouse\_STAT1KO\_UNSTIM\_9\_H3K4me3\_IP: 54373346, 41790007  
 ChIP\_mouse\_STAT1KO\_IFNA\_6\_H3K4me3\_input: 49758206, 48159891  
 ChIP\_mouse\_STAT1KO\_IFNA\_6\_H3K4me3\_IP: 44031334, 41844718  
 ChIP\_mouse\_STAT1KO\_IFNA\_9\_H3K4me3\_input: 65642306, 56847076  
 ChIP\_mouse\_STAT1KO\_IFNA\_9\_H3K4me3\_IP: 64749912, 47633226  
 ChIP\_mouse\_STAT1KO\_IFNA\_9a\_H3K4me3\_input: 50900496, 47446035  
 ChIP\_mouse\_STAT1KO\_IFNA\_9a\_H3K4me3\_IP: 53158385, 45992963  
 ChIP\_mouse\_WT\_UNSTIM\_1\_H3K4me3\_input: 57615188, 55947441  
 ChIP\_mouse\_WT\_UNSTIM\_1\_H3K4me3\_IP: 42883798, 40933952  
 ChIP\_mouse\_WT\_UNSTIM\_4\_H3K4me3\_input: 45583080, 41869736  
 ChIP\_mouse\_WT\_UNSTIM\_4\_H3K4me3\_IP: 41604442, 38129650  
 ChIP\_mouse\_WT\_UNSTIM\_3\_H3K4me3\_input: 74110467, 71739155  
 ChIP\_mouse\_WT\_UNSTIM\_3\_H3K4me3\_IP: 86149162, 83256048  
 ChIP\_mouse\_WT\_UNSTIM\_6\_H3K4me3\_input: 54791551, 53463964  
 ChIP\_mouse\_WT\_UNSTIM\_6\_H3K4me3\_IP: 44792436, 42995551  
 ChIP\_mouse\_WT\_UNSTIM\_7\_H3K4me3\_input: 44883699, 43068178  
 ChIP\_mouse\_WT\_UNSTIM\_7\_H3K4me3\_IP: 49142753, 45857688  
 ChIP\_mouse\_WT\_UNSTIM\_8\_H3K4me3\_input: 50846078, 47581680  
 ChIP\_mouse\_WT\_UNSTIM\_8\_H3K4me3\_IP: 51479728, 48782474  
 ChIP\_mouse\_WT\_UNSTIM\_9\_H3K4me3\_input: 27867793, 24913047  
 ChIP\_mouse\_WT\_UNSTIM\_9\_H3K4me3\_IP: 54002732, 42638999  
 ChIP\_mouse\_WT\_UNSTIM\_1\_STAT5\_input: 36890417, 31797818  
 ChIP\_mouse\_WT\_UNSTIM\_1\_STAT5\_IP: 37699714, 18471901  
 ChIP\_mouse\_WT\_IFNA\_3\_H3K4me3\_input: 67258735, 64901834  
 ChIP\_mouse\_WT\_IFNA\_3\_H3K4me3\_IP: 85469212, 82485029  
 ChIP\_mouse\_WT\_IFNA\_6\_H3K4me3\_input: 44357730, 43072762  
 ChIP\_mouse\_WT\_IFNA\_6\_H3K4me3\_IP: 45604260, 43689740  
 ChIP\_mouse\_WT\_IFNA\_7\_H3K4me3\_input: 43510699, 42531132  
 ChIP\_mouse\_WT\_IFNA\_7\_H3K4me3\_IP: 48001647, 45145287  
 ChIP\_mouse\_WT\_IFNA\_8\_H3K4me3\_input: 57849731, 53199933  
 ChIP\_mouse\_WT\_IFNA\_8\_H3K4me3\_IP: 54378361, 49453599  
 ChIP\_mouse\_WT\_IFNA\_9\_H3K4me3\_input: 48123748, 43354052  
 ChIP\_mouse\_WT\_IFNA\_9\_H3K4me3\_IP: 48188861, 38205143  
 ChIP\_mouse\_WT\_IL12IL18\_1\_H3K4me3\_input: 55532890, 52759788  
 ChIP\_mouse\_WT\_IL12IL18\_1\_H3K4me3\_IP: 43963022, 41461815  
 ChIP\_mouse\_WT\_IL12IL18\_7\_H3K4me3\_input: 49799893, 48805234  
 ChIP\_mouse\_WT\_IL12IL18\_7\_H3K4me3\_IP: 41769130, 40394337  
 ChIP\_mouse\_WT\_IL12IL18\_8\_H3K4me3\_input: 55881436, 51915786  
 ChIP\_mouse\_WT\_IL12IL18\_8\_H3K4me3\_IP: 54222541, 49911335  
 ChIP\_mouse\_WT\_IL2IL15\_4\_H3K4me3\_input: 55367152, 50654240  
 ChIP\_mouse\_WT\_IL2IL15\_4\_H3K4me3\_IP: 41865602, 37990709  
 ChIP\_mouse\_WT\_IL2IL15\_7\_H3K4me3\_input: 49695467, 48679096  
 ChIP\_mouse\_WT\_IL2IL15\_7\_H3K4me3\_IP: 39226168, 37795774  
 ChIP\_mouse\_WT\_IL2IL15\_8\_H3K4me3\_input: 52849758, 49378664  
 ChIP\_mouse\_WT\_IL2IL15\_8\_H3K4me3\_IP: 47348120, 43789735  
 ChIP\_mouse\_WT\_IL2IL15\_1\_STAT5\_input: 38969495, 34972889  
 ChIP\_mouse\_WT\_IL2IL15\_1\_STAT5\_IP: 22758219, 13259916  
 ChIP\_mouse\_WT\_IL2IL15IL12IL18IFNA\_7\_H3K4me3\_input: 38399557, 34686817  
 ChIP\_mouse\_WT\_IL2IL15IL12IL18IFNA\_7\_H3K4me3\_IP: 43023275, 36101979  
 ChIP\_mouse\_WT\_IL2IL15IL12IL18IFNA\_8\_H3K4me3\_input: 46443381, 43150522  
 ChIP\_mouse\_WT\_IL2IL15IL12IL18IFNA\_8\_H3K4me3\_IP: 58738987, 54513173  
 ChIP\_mouse\_WT\_MCMVDO\_2\_H3K4me3\_input: 50871694, 49721550  
 ChIP\_mouse\_WT\_MCMVDO\_2\_H3K4me3\_IP: 53783326, 51666720  
 ChIP\_mouse\_WT\_MCMVDO\_4\_H3K4me3\_input: 39751142, 38230388  
 ChIP\_mouse\_WT\_MCMVDO\_4\_H3K4me3\_IP: 42776020, 26641240  
 ChIP\_mouse\_WT\_MCMVD2\_1\_H3K4me3\_input: 32836191, 24097087  
 ChIP\_mouse\_WT\_MCMVD2\_1\_H3K4me3\_IP: 47474143, 44040562  
 ChIP\_mouse\_WT\_MCMVD2\_2\_H3K4me3\_input: 39301295, 38440770  
 ChIP\_mouse\_WT\_MCMVD2\_2\_H3K4me3\_IP: 44985113, 42176774  
 ChIP\_mouse\_WT\_MCMVD2\_3\_H3K4me3\_input: 44029048, 41542165

ChIP\_mouse\_WT\_MCMVD2\_3\_H3K4me3\_IP: 46714944, 42595387  
 ChIP\_mouse\_WT\_MCMVD4\_2\_H3K4me3\_input: 34346823, 32949940  
 ChIP\_mouse\_WT\_MCMVD4\_2\_H3K4me3\_IP: 41593003, 38776115  
 ChIP\_mouse\_WT\_MCMVD4\_3\_H3K4me3\_input: 41768025, 39665828  
 ChIP\_mouse\_WT\_MCMVD4\_3\_H3K4me3\_IP: 50964850, 47121017  
 ChIP\_mouse\_WT\_MCMVD4\_4\_H3K4me3\_input: 39344629, 37504279  
 ChIP\_mouse\_WT\_MCMVD4\_4\_H3K4me3\_IP: 55372425, 51822028  
 ChIP\_mouse\_WT\_MCMVD7\_2\_H3K4me3\_input: 58133706, 56972123  
 ChIP\_mouse\_WT\_MCMVD7\_2\_H3K4me3\_IP: 45169138, 42838230  
 ChIP\_mouse\_WT\_MCMVD7\_3\_H3K4me3\_input: 41086766, 39490099  
 ChIP\_mouse\_WT\_MCMVD7\_3\_H3K4me3\_IP: 44758162, 42604343  
 ChIP\_mouse\_WT\_MCMVD35\_4\_H3K4me3\_input: 32672839, 31748162  
 ChIP\_mouse\_WT\_MCMVD35\_4\_H3K4me3\_IP: 39974301, 38640211  
 ChIP\_mouse\_WT\_MCMVD35\_5\_H3K4me3\_input: 40112280, 35606163  
 ChIP\_mouse\_WT\_MCMVD35\_5\_H3K4me3\_IP: 35740009, 33040844

## Antibodies

The following antibodies were used for ChIP-Seq primarily reported in this study: anti-pSTAT5 (#AF2168, R&D Systems, lot# KVE0318071), anti-H3K4me3 (Millipore, 07-473, lot# 3018770).

## Peak calling parameters

Reads were trimmed for adaptors and removal of low quality reads using Trimmomatic (v.0.36). Trimmed reads were mapped to the *Mus musculus* genome (mm10 assembly) using Bowtie2 (v2.2.9 or v2.3.4). For STAT5 ChIP, peak calling was performed on each IP-input paired sample using MACS2 (v2.1.1.20160309), using arguments “-f BAM -p 0.05 -m 2 50”, for single-end peak calling. For H3K4me3 ChIP, peak calling was performed on each IP-input paired sample with MACS2, with arguments “-BAMPE -q 0.05”.

## Data quality

For STAT5 ChIP, Irreproducible discovery rate (IDR) calculations were performed on all pairs of replicates using an oracle peak list called from merged replicates. A total of 1,201 peaks passed an IDR threshold of 0.05.

For H3K4me3 ChIP, peak that exhibited a q-value score higher than the 25th percentile were retained. Samples that yielded less than 6000 of these filtered peaks were not considered.

## Software

DESeq2 (v.1.14.1 or v.1.22.2)  
 Trimmomatic (v.0.36)  
 Bowtie2 (v.2.2.9 or v.2.3.4)  
 GenomicAlignments (v1.10.1 or v1.18.1)  
 MACS2 (v.2.1.1.20160309)  
 ChipPeakAnno (v.3.8.9)  
 UCSC mm10 Known Gene Annotation Package (v.9)  
 Irreproducible Discovery Rate (IDR) (v.2.0.2 or v2.0.3)  
 bedtools2 (v.2.26.0)  
 bedGraphToBigWig (v.4)  
 deepTools (v3.2.1)  
 Gviz (v.1.18.2)  
 ComplexHeatmap (v.1.18.1 or v.1.99.7)  
 Cytoscape (v.3.7.1)  
 R (v.3.3.3 or v.3.5.3)

## Flow Cytometry

### Plots

Confirm that:

- The axis labels state the marker and fluorochrome used (e.g. CD4-FITC).
- The axis scales are clearly visible. Include numbers along axes only for bottom left plot of group (a 'group' is an analysis of identical markers).
- All plots are contour plots with outliers or pseudocolor plots.
- A numerical value for number of cells or percentage (with statistics) is provided.

### Methodology

## Sample preparation

Spleens were dissociated using glass slides and filtered through a 100 µm strainer. Red blood cells in spleen were lysed using ACK lysis buffer. NK cells were enriched before cell sorting by incubation of whole splenocytes with the following antibodies: CD3ε (17A2), CD4 (GK1.5), CD8 (2.43), Ter119 (TER-119), CD19 (1D3), Ly6G (1A8) (BioXCell). This was followed by magnetic depletion using goat anti-rat beads (Qiagen). For human samples, PBMC were isolated by Ficoll gradient purification before sorting.

## Instrument

BD LSR II was used for data collection, and BD Aria II was used for cell sorting.

## Software

BD FACSDiva (v.8.0.2) was used for data collection, and FlowJo (v10.5.3) for data analysis.

## Cell population abundance

Cell populations were sorted to >95% purity post sort, as determined by flow cytometry.

Gating strategy

Depleted splenocytes were sorted for NK cells, gated as CD3 $\epsilon$ - TCR $\beta$ - CD19- F4/80- NK1.1+ among the live gate (using Live/Dead stain). For in vivo H3K4me3 ChIP, depleted splenocytes were sorted for Ly49H+ NK cells, gated as CD3 $\epsilon$ - TCR $\beta$ - CD19- F4/80- NK1.1+ Ly49H+ CD69+ (d2 only) and TdTom+ (d35 only). Human NK cells were sorted from PBMC, gated as DAPI- CD14- CD3- CD56+.

Tick this box to confirm that a figure exemplifying the gating strategy is provided in the Supplementary Information.
